# Supplementary material for: Enhanced Raman scattering on two-dimensional palladium diselenide
Source: Royal Society of Chemistry journal article supplement (doi:10.1039/d1nr07126b), 2022-01-01
Supplement: d1nr07126b1.pdf [file d1nr07126b1.pdf]

## Supporting Information

### The Enhanced Raman Scattering on Two-Dimensional Palladium Diselenide

Zehong Lei, Xinkuo Zhang, Yu Zhao,\* Aixiang Wei, Lili Tao,\* Yibin Yang, Zhaoqiang Zheng, Li Tao, Peng Yu, and Jingbo Li

zhaoyu@gdut.edu.cn & taoll@gdut.edu.cn

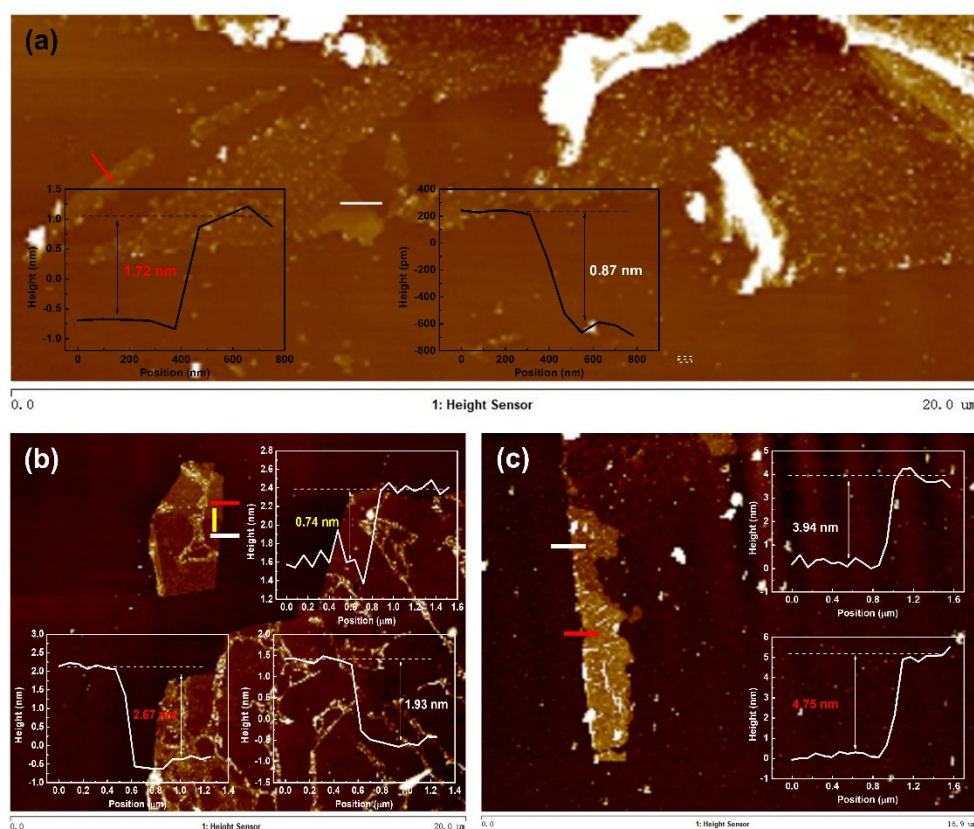

**Figure S1.** The AFM image of PdSe<sub>2</sub> with different layer numbers on mica. Each thickness for different positions was marked with relative color.

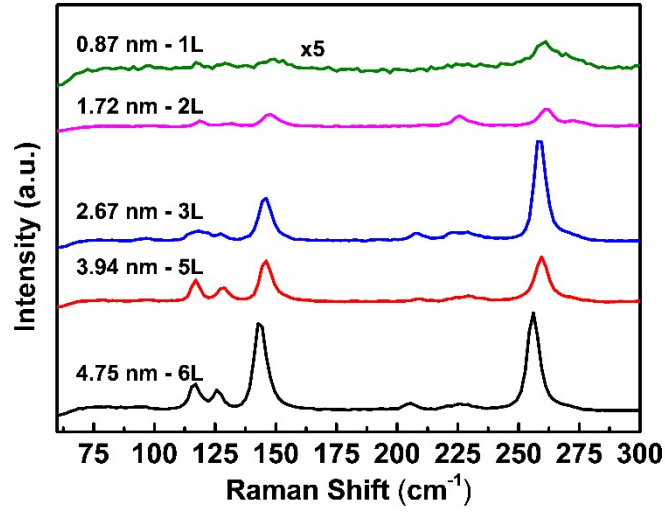

**Figure S2.** The Raman spectra of PdSe<sub>2</sub> with different layer numbers. The measured PdSe<sub>2</sub> samples are the same ones in **Figure S1** after transferred to SiO<sub>2</sub>/Si substrate.

**Table S1.** The average intensity of Si peak with the corresponding layers. Each Si peak was randomly collected on the same flakes, using NOST FEX with the acquisition time of 5 s.

| Spot          | Bare SiO <sub>2</sub> | 1L   | 2L   | 3L   | 5L   |
|---------------|-----------------------|------|------|------|------|
| 1             | 4109                  | 3102 | 2461 | 2133 | 1476 |
| 2             | 4078                  | 3128 | 2460 | 2098 | 1630 |
| 3             | 4110                  | 3180 | 2457 | 2158 | 1597 |
| 4             | 4227                  | 3088 | 2471 | 2205 | 1628 |
| 5             | 4118                  | 3124 | 2462 | 2195 | 1609 |
| Average       | 4128                  | 3124 | 2462 | 2158 | 1588 |
| Normalization | 1.32                  | 1.00 | 0.79 | 0.69 | 0.51 |

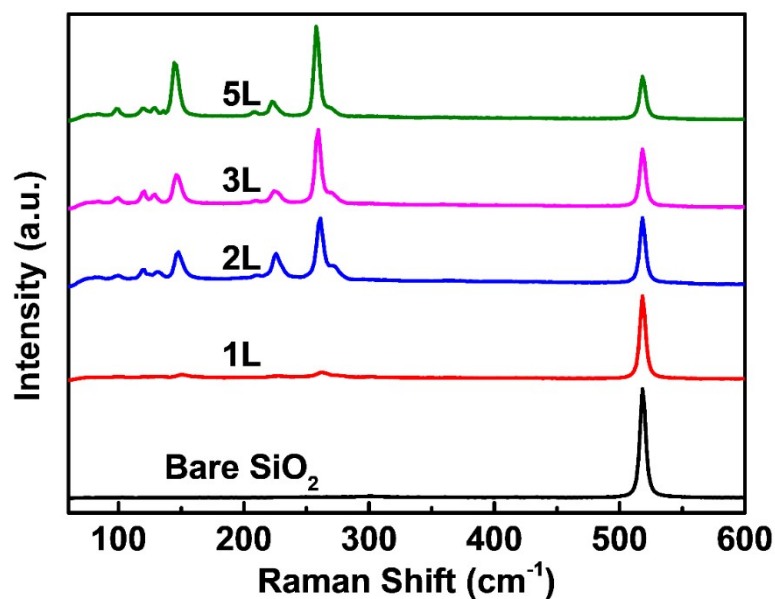

**Figure S3.** The Si signal intensity follows the changes of the layer numbers of PdSe<sub>2</sub>.

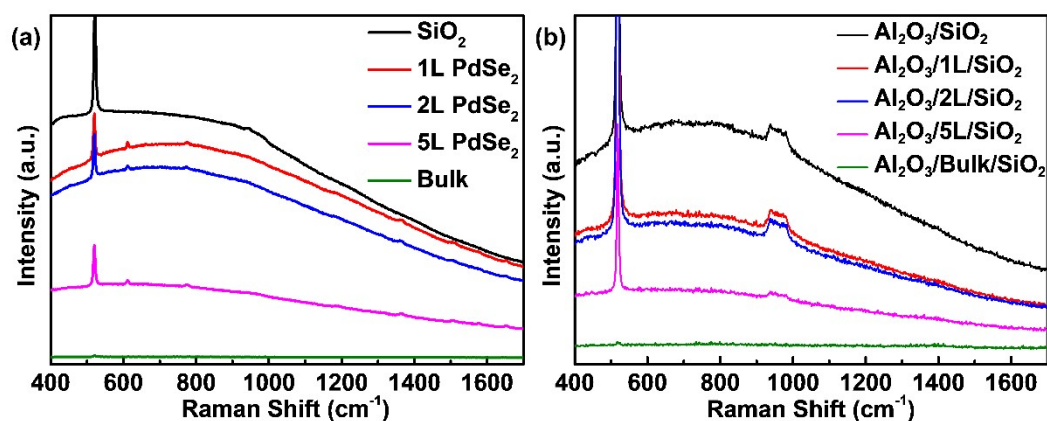

**Figure S4.** (a) Raman spectra for  $10^{-6}$  M R6G coated on different substrates without baseline correction. (b) The relative Raman spectra of  $10^{-6}$  M R6G on monolayer PdSe<sub>2</sub> with the deposition of Al<sub>2</sub>O<sub>3</sub>. Noted that the strong peak at about  $1000\text{ cm}^{-1}$  is the second-order Raman scattering from the silicon substrate.

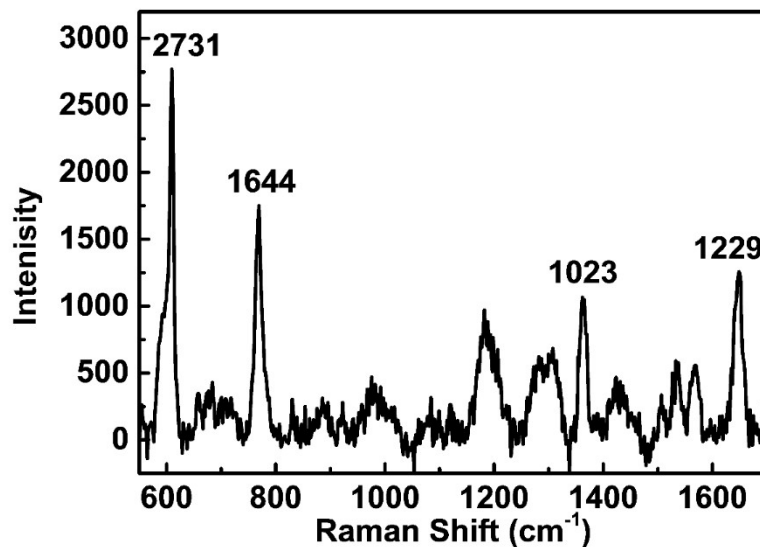

**Figure S5.** Raman spectra of bulk R6G prepared by the drying off of 5  $\mu\text{L}$   $10^{-4}$  M water solution on a 285 nm  $\text{SiO}_2/\text{Si}$  substrate. Raman spectra was obtained using the LabRAM HR Evolution system with a laser power of 10 mW, acquisition time of 1 s and accumulation times of 3 times.

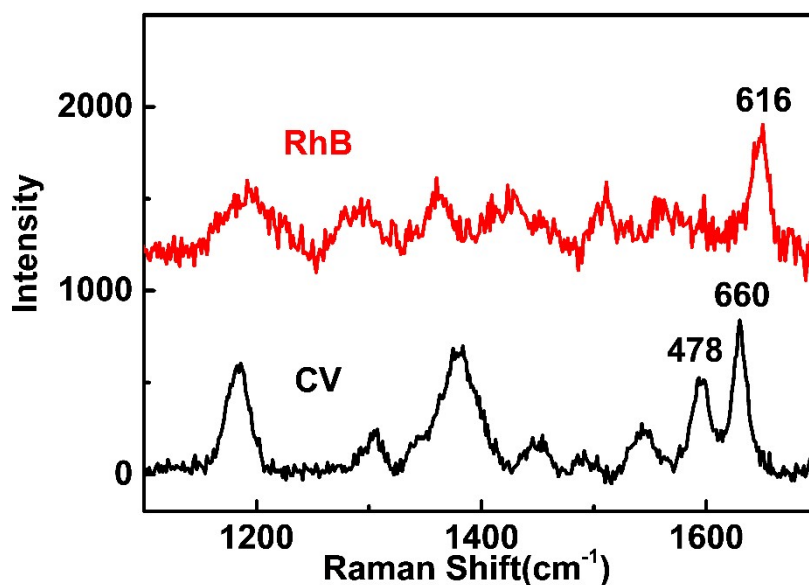

**Figure S6.** Raman spectra of bulk RhB and CV. RhB is obtained by the drying off of 5  $\mu\text{L}$   $10^{-3}$  M water solution on a 285 nm  $\text{SiO}_2/\text{Si}$  substrate. Raman spectra was obtained using the LabRAM HR Evolution system with a laser power of 10 mW, acquisition

time of 1 s and accumulation times of 3 times. CV is obtained by the drying off of 5  $\mu\text{L}$   $10^{-4}$  M water solution on a 285 nm  $\text{SiO}_2/\text{Si}$  substrate. Raman spectra was obtained using LabRAM HR Evolution system with a laser power of 10 mW, acquisition time of 5 s and accumulation times of 5 times...

In our work, we use analytes with a concentration of  $10^{-4}$  M as the referenced bulk sample. The average thickness of the referenced analytes is lower than 100 nm, which is far smaller than the laser penetration depth of 21 and 40  $\mu\text{m}$  for our Horiba LabRAM HR Evolution system and NOST FEX (South Korea), respectively. So, the Raman enhancement factors (EFs) can be valued by the following equation: <sup>[1]</sup>

$$EF = \frac{I_{SERS}}{I_{RS}} \times \frac{N_{RS}}{N_{SERS}} \quad (1)$$

$$N_{RS} = N_A n R_l^2 / R_{dif}^2 \quad (2)$$

$$N_{SERS} = N_A n \pi R_l^2 / S_{sub} \quad (3)$$

where  $I_{SERS}$  and  $I_{RS}$  are the SERS intensities and the intensity of bulk probe molecules in Raman spectra, respectively. And  $N_{SERS}$  and  $N_{RS}$  are the mounts of probed molecules in the SERS experiment and the amount of bulk probed molecules in the normal Raman experiment, respectively. The number of probe molecules can be estimated by formula (2) and (3), where  $N_A$  is the Avogadro's constant,  $n$  refers to the molar quantity of probe molecules,  $R_l$  refers to the radius of laser spot area ( $\sim 1 \mu\text{m}$ ),  $R_{dif}$  refers to the radius of the drop of the  $5 \mu\text{L}$   $10^{-4}$  M water solution on the silicon substrate ( $\sim 0.1 \text{ cm}$ ),  $S_{sub}$  refers to the silicon substrate area ( $\sim 2 \text{ cm}^2$ ). In this paper, R6G was used to estimate the Raman EF of  $\text{PdSe}_2$ .

For the EF of 10  $\mu$ L 10<sup>-9</sup> M R6G:

$$N_{RS} = 6.02 \times 10^{23} \times 5 \times 10^{-6} \times 10^{-4} \times \frac{1}{10^6} = 3.01 \times 10^9$$

$$N_{SERS} = 6.02 \times 10^{23} \times 10^{-9} \times 10 \times 10^{-6} \times \frac{3.14}{2 \times 10^8} = 94.51$$

$$EF = 0.1 \times \frac{193}{2731} \times \frac{3.01 \times 10^9}{94.51} \approx 2.25 \times 10^5$$

**Table S2.** The SERS intensities of R6G in different concentrations and Raman Shift.

| Concentration \ Wavenumber | Wavenumber           |                      |                       |                       |
|----------------------------|----------------------|----------------------|-----------------------|-----------------------|
|                            | 615 cm <sup>-1</sup> | 771 cm <sup>-1</sup> | 1351 cm <sup>-1</sup> | 1652 cm <sup>-1</sup> |
| 10 <sup>-6</sup> M         | 1915                 | 667                  | 325                   | 266                   |
| 10 <sup>-7</sup> M         | 553                  | 192                  | 164                   | 123                   |
| 10 <sup>-8</sup> M         | 315                  | 132                  | 101                   | 76                    |
| 10 <sup>-9</sup> M         | 193                  | 56                   | 58                    | 39                    |

**Table S3.** The EFs in different concentrations and Raman Shift for R6G.

| Concentration \ Wavenumber | Wavenumber           |                      |                       |                       |
|----------------------------|----------------------|----------------------|-----------------------|-----------------------|
|                            | 615 cm <sup>-1</sup> | 771 cm <sup>-1</sup> | 1351 cm <sup>-1</sup> | 1652 cm <sup>-1</sup> |
| 10 <sup>-6</sup> M         | 2333.14              | 1292.09              | 1011.76               | 689.28                |
| 10 <sup>-7</sup> M         | 6448.99              | 3719.53              | 5105.71               | 3187.43               |
| 10 <sup>-8</sup> M         | 36738.68             | 2557.177             | 3144.37               | 1969.47               |
| 10 <sup>-9</sup> M         | 225073.48            | 108486.31            | 180568.12             | 101065.15             |

**Table S4.** The EFs for 10<sup>-6</sup> M RhB.

| Wavenumber | $I_{RS}$ | $I_{SERS}$ | $EF$ |
|------------|----------|------------|------|
|------------|----------|------------|------|

|                       |     |    |      |
|-----------------------|-----|----|------|
| 1650 cm <sup>-1</sup> | 616 | 70 | 90.2 |
|-----------------------|-----|----|------|

**Table S5.** The EFs for 10<sup>-7</sup> M CV.

| Wavenumber            | $I_{RS}$ | $I_{SERS}$ | $EF$  |
|-----------------------|----------|------------|-------|
| 1581 cm <sup>-1</sup> | 475      | 65         | 139.5 |
| 1620 cm <sup>-1</sup> | 660      | 73         | 112.7 |

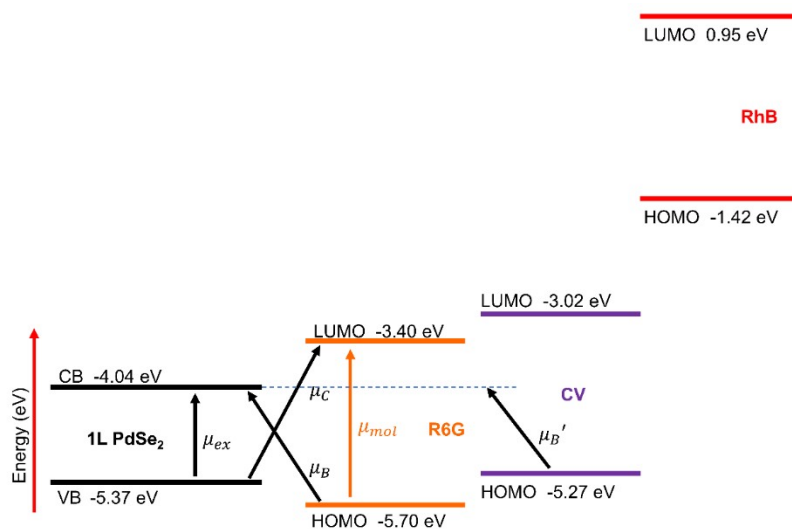

**Figure S7.** The schematic diagram of the relative position of the energy bands between molecules and monolayer PdSe<sub>2</sub>.

We speculated that the different detection limits and EF of the three molecules can be attributed to the difference in the photoinduced charge transfer (PICT) processes. We investigate the band alignment between the molecules and monolayer PdSe<sub>2</sub> (see **Figure S7**) to discuss the possible mechanism behind. The energy bands of RhB are far away from the conduction band minimum (CBM) of the monolayer PdSe<sub>2</sub>, possibly resulting in the weakest PICT process among the three molecules. The electrons can be excited from the HOMO of R6G and CV to the CBM of PdSe<sub>2</sub> (transition of  $\mu_B$  and  $\mu_B'$  in the figure) since the excitation energy is larger than the energy difference between HOMO of molecules and CBM of monolayer PdSe<sub>2</sub>. However, the hole transferred from the valence band maximum (VBM) to the LUMO of CV is not allowed as the excitation energy needed (2.35 eV) is slightly larger than the energy of laser, while the same process for R6G (transition of  $\mu_c$ ) is possible due to its lower LUMO position.

Thereby, the PICT is more efficient for R6G than CV when coupled with monolayer PdSe<sub>2</sub>. The discussion of the charge transfer process using the band structure of the molecules and 2D PdSe<sub>2</sub> well explained the different detection limits and EF for the three molecules.

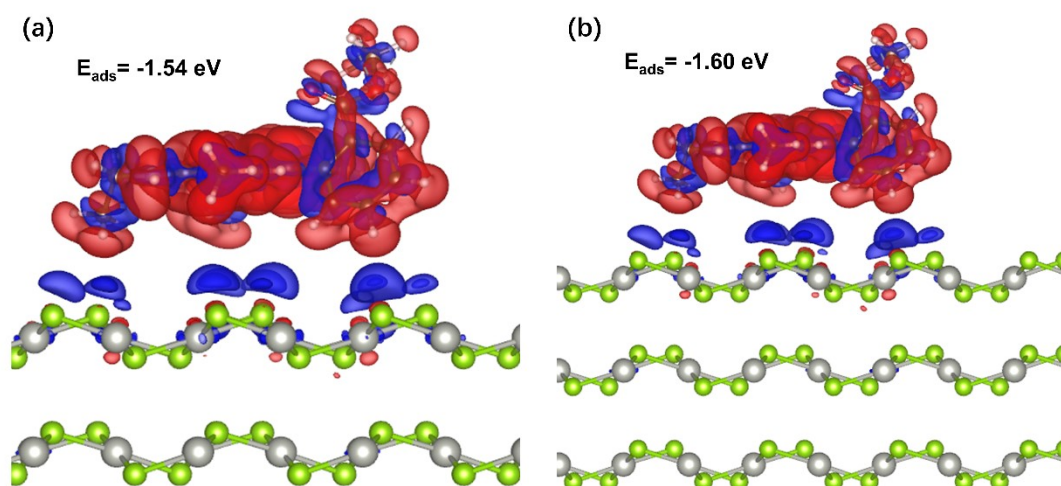

**Figure S8.** Charge density difference of R6G adsorption on bilayer (a) and trilayer (b) PdSe<sub>2</sub>.

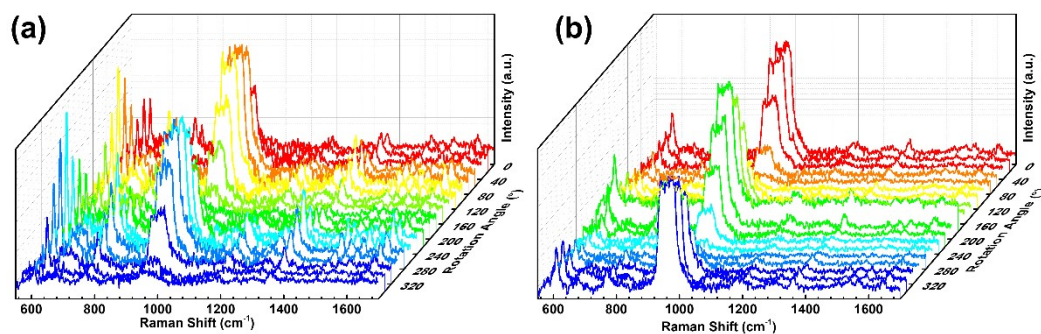

**Figure S9.** Anisotropic Raman enhancement measurement. Angle-resolved polarized Raman spectra of R6G ( $10^{-6} \text{ M}$ ) under the (a) parallel and (b) cross configurations. Noted that the strong peak at about  $1000 \text{ cm}^{-1}$  is the second-order Raman scattering from the silicon substrate.



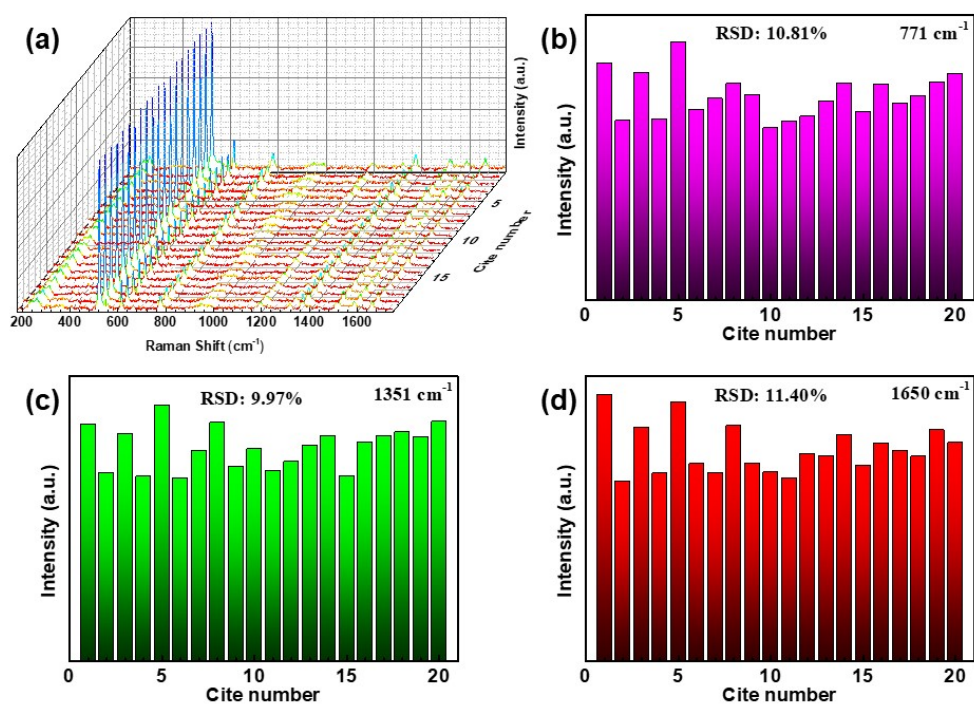

**Figure S10.** Uniformity of SERS signal on PdSe<sub>2</sub> substrate. (a) SERS spectra of R6G (10<sup>-6</sup> M) collected from 20 randomly selected sites on monolayer PdSe<sub>2</sub>. (b-d) Histogram distribution of the Raman intensities at (b) 771 cm<sup>-1</sup>, (c) 1351 cm<sup>-1</sup>, and (d) 1650 cm<sup>-1</sup>.

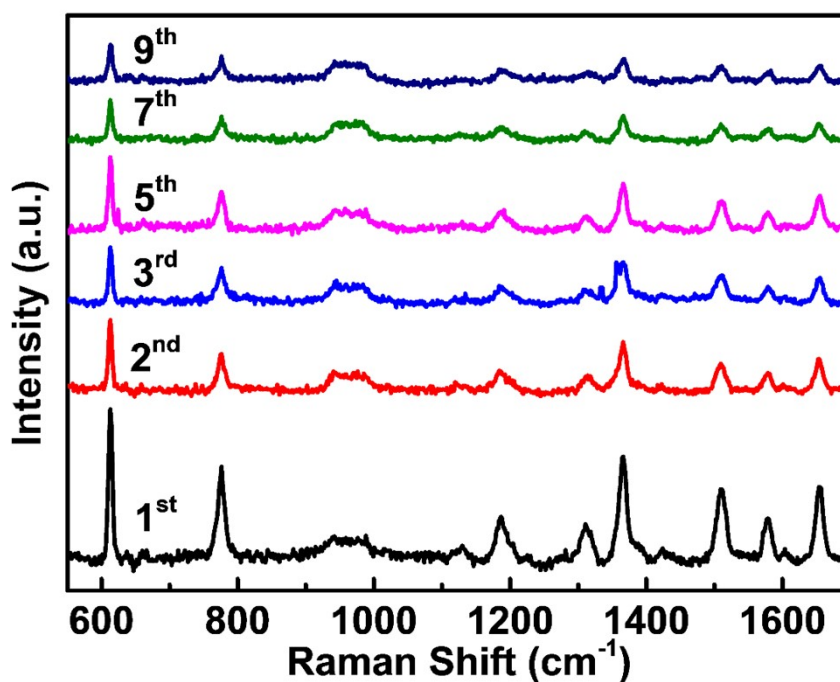

**Figure S11.** Raman spectra of R6G ( $10^{-6}$  M) on monolayer PdSe<sub>2</sub> at the same spot for increased measured times.

Raman spectra of the R6G molecule at the same spot for different collecting times were demonstrated in **Figure S11**. Each collection was exposed to 532 nm laser for 25 seconds (acquisition for five seconds and accumulation for five times). An obvious reduction of R6G signal intensity was found via a comparison between the first collection and the second collection. After eight collections, only 14.5 % Raman signal intensity remained in the ninth collection at  $615\text{cm}^{-1}$ . The photobleaching is usually observed on conventional SPR-based SERS substrates rather than on 2D materials.<sup>[2]</sup> It is commonly believed that 2D materials have a negligible photobleaching effect as the excitation state of molecules excited by laser can rapidly relax to the ground state through the additional path provided by a charge transfer of substrate. The obvious photobleaching effect may probably originate from the indirect band structure of 2D

PdSe<sub>2</sub>. The indirect bandgap of few-layer PdSe<sub>2</sub> may prolong the lifetime of the excited electrons,<sup>[3, 4]</sup> leading to the lower chemical potential difference between R6G and PdSe<sub>2</sub> and a consequential suppression of the charge transition from LUMO of the molecule to CB of the substrate. We suggest a suitable power of the excitation laser should be adopted to balance the requirement of an excellent signal of SERS and the reduction of the photobleaching effect.

**Table S6.** Comparison of the SERS performances among various 2D materials. h-BN: hexagonal boron nitride. CuPc: copper phthalocyanine. MB: methylene blue. CV: crystal violet.

Stability: Stability of SERS. The approximate ratio of Raman signal intensity after to before exposed in the air for a certain period.

| SERS material        | Analyte -Excitation wavelength (nm) | LOD (M )                    | EF                   | Stability | Reference |
|----------------------|-------------------------------------|-----------------------------|----------------------|-----------|-----------|
| PdSe <sub>2</sub>    | R6G – 532 nm                        | 10 <sup>-9</sup>            | 2.2×10 <sup>5</sup>  | 1(30day)  | This work |
| Graphene             | R6G – 514 nm                        | 8×10 <sup>-9</sup>          | N/A                  | N/A       | 5         |
| h-BN                 | CuPc – 633 nm                       | Lower than MoS <sub>2</sub> | N/A                  | N/A       | 6         |
| 2H-MoS <sub>2</sub>  | R6G – 532 nm                        | 5×10 <sup>-6</sup>          | N/A                  | N/A       | 7         |
| 1T-MoS <sub>2</sub>  | R6G – 532 nm                        | 10 <sup>-9</sup>            | 2.92×10 <sup>4</sup> | N/A       | 8         |
| 1T-MoSe <sub>2</sub> | R6G – 532 nm                        | 10 <sup>-8</sup>            | N/A                  | N/A       | 9         |
| 1T'-ReS <sub>2</sub> | R6G – 532 nm                        | 10 <sup>-9</sup>            | N/A                  | N/A       | 10        |

| SERS material         | Analyte -Excitation wavelength (nm) | LOD (M )            | EF                   | Stability   | Reference |
|-----------------------|-------------------------------------|---------------------|----------------------|-------------|-----------|
| 1T'-WTe <sub>2</sub>  | R6G – 532 nm                        | 4×10 <sup>-14</sup> | 1.8×10 <sup>9</sup>  | 0.75(12day) | 2         |
| 1T'-MoTe <sub>2</sub> | R6G – 532 nm                        | 4×10 <sup>-13</sup> | 1.6×10 <sup>8</sup>  | N/A         | 2         |
| NbS <sub>2</sub>      | MB – 633 nm                         | 10 <sup>-14</sup>   | N/A                  | 0.25(30day) | 11        |
| NbSe <sub>2</sub>     | R6G – 532 nm                        | 5×10 <sup>-16</sup> | N/A                  | 0.25(35day) | 12        |
| NbTe <sub>2</sub>     | R6G – 532 nm                        | 10 <sup>-9</sup>    | 1.37×10 <sup>6</sup> | N/A         | 13        |
| PtSe <sub>2</sub>     | R6G – 532 nm                        | 10 <sup>-9</sup>    | 1.3×10 <sup>5</sup>  | N/A         | 14        |
| GaN                   | CV – 532 nm                         | 2×10 <sup>-7</sup>  | 5.2×10 <sup>5</sup>  | 0.9(60day)  | 15        |

## References

1. A. I. Pérez-Jiménez, D. Lyu, Z. Lu, G. Liu, B. Ren, *Chem. Sci.*, 2020, **11**, 4563-4577.
2. L. Tao, K. Chen, Z. Chen, C. Cong, C. Qiu, J. Chen, X. Wang, H. Chen, T. Yu, W. Xie, S. Deng, J. B. Xu, *J. Am. Chem. Soc.*, 2018, **140**(28), 8696-8704.
3. A. D. Oyedele, S. Yang, L. Liang, A. A. Puretzky, K. Wang, J. Zhang, P. Yu, P. R. Pudasaini, A. W. Ghosh, Z. Liu, C. M. Rouleau, B. G. Sumpter, M. F. Chisholm, W. Zhou, P. D. Rack, D. B. Geohegan, K. Xiao, *J. Am. Chem. Soc.*, 2017, **139**, 14090–14097.
4. H. Kim, H. J. Choi, *Phys. Rev. B*, 2021, **103**, 165419.
5. X. Ling, L. Xie, Y. Fang, H. Xu, H. Zhang, J. Kong, M. Dresselhaus, J. Zhang, Z. Liu, *Nano Lett.*, 2010, **10**(2), 553-561.
6. X. Ling, W. Fang, Y. Lee, P. Araujo, X. Zhang, J. Rodriguez-Nieva, Y. Lin, J. Zhang, J. Kong, M. Dresselhaus, *Nano Lett.*, 2014, **14**(6), 3033–3040.

7. Y. Lee, H. Kim, J. Lee, S. H. Yu, E. Hwang, C. Lee, J. H. Ahn, J. H. Cho, *Chem. Mater.*, 2016, **28**(1), 180-187.
8. E. Er, H. L. Hou, A. Criado, J. Langer, M. Möller, N. Erk, L. M. Liz-Marzán, M. Prato, *Chem. Mater.*, 2019, **31**(15), 5725-5734.
9. Y. Yin, P. Miao, Y. Zhang, J. Han, X. Zhang, Y. Gong, L. Gu, C. Xu, T. Yao, P. Xu, Y. Wang, B. Song, S. Jin, *Adv. Funct. Mater.*, 2017, **27**(16), 1606694.
10. P. Miao, J. K. Qin, Y. Shen, H. Su, J. Dai, B. Song, Y. Du, M. Sun, W. Zhang, H. L. Wang, C. Y. Xu, P. Xu, *Small*, 2018, **14**, 1704079.
11. X. Song, Y. Wang, F. Zhao, Q. Li, H. Q. Ta, M. H. Rümmeli, C. G. Tully, Z. Li, W. J. Yin, L. Yang, K. B. Lee, J. Yang, I. Bozkurt, S. Liu, W. Zhang, M. Chhowalla, *ACS Nano*, 2019, **13**, 8312-8319.
12. Q. Lv, X. Wu, J. Tan, B. Liu, L. Gan, J. Li, Z. H. Huang, F. Kang, R. Lv, *J. Mater. Chem. A*, 2021, **9**, 2725-27331.
13. K. Wang, Z. Guo, Y. Li, Y. Guo, H. Liu, W. Zhang, Z. Zou, Y. Zhang, Z. Liu, *ACS Appl. Nano Mater.*, 2020, **3**(11), 11363-11371.
14. X. Hou, X. Tang, Y. Wei, S. Wang, Q. Hao, J. M. Hou, T. Qiu, *Cell Reports Physical Science*, 2021, **2**(7), 100488.
15. S. Zhao, H. Wang, L. Niu, W. Xiong, Y. Chen, M. Zeng, S. Yuan, L. Fu, *Small*, 2021, **17**, 2103442.
